# Supplementary material
Source: PubMed Central journal article supplement (PMC7540159)
Supplement: ajtr0012-5866-f6.pdf [file ajtr0012-5866-f6.pdf]

## Identifying phenotype discordance between primary and synchronous metastatic BC

**Supplementary Table 1.** Primary antibodies used in immunohistochemistry analysis and results of the primary and metastatic tumors

| Antibody | Tumor Stain           |                       | Source/Isotype            | Company              | Dilution     |
|----------|-----------------------|-----------------------|---------------------------|----------------------|--------------|
|          | Primary               | Metastasis            |                           |                      |              |
| ER       | Strong positive       | Negative              | Mouse monoclonal antibody | Fuzhou Maxim Biotech | Ready-to-use |
| PR       | Strong positive       | Negative              | Mouse monoclonal antibody | Fuzhou Maxim Biotech | Ready-to-use |
| HER2     | Strong positive       | Partial weak positive | Rabbit monoclonal IgG     | Abcam                | 1:3000       |
| Ki-67    | 20% positive          | 90% positive          | Rabbit monoclonal IgG     | Abcam                | 1:100        |
| CD44     | Partial weak positive | Strong positive       | Rabbit polyclonal IgG     | Proteintech Group    | 1:500        |
| CD24     | Strong positive       | Strong positive       | Mouse monoclonal IgG1     | Abcam                | 1:100        |
| ALDH1    | Moderate positive     | Strong positive       | Rabbit polyclonal IgG     | Proteintech Group    | 1:400        |

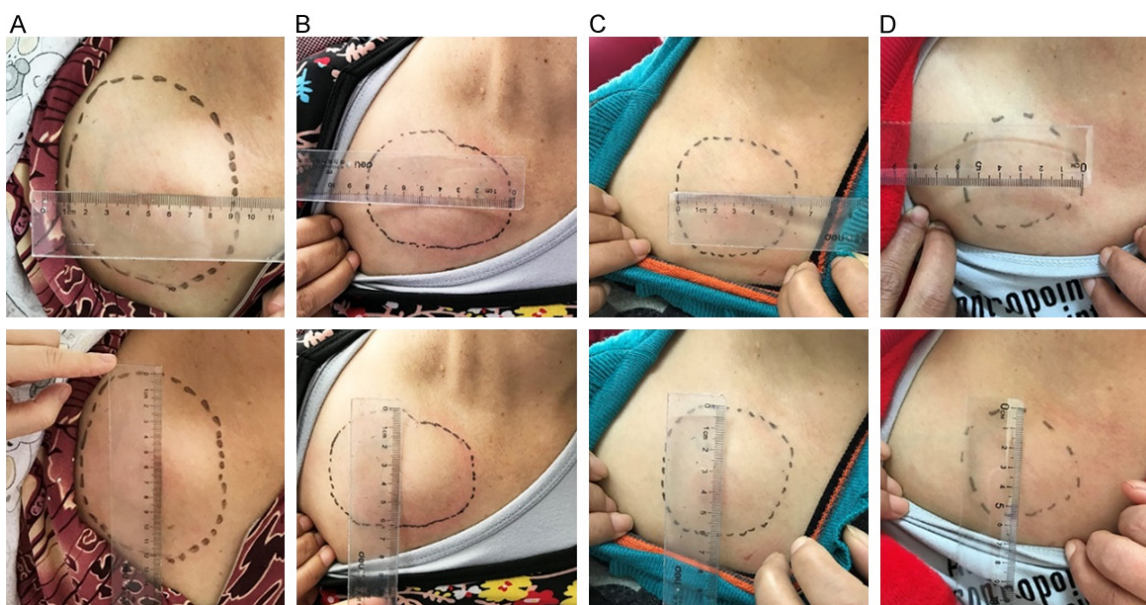

**Supplementary Figure 1.** The size of metastatic subclavian lymph node was shown before (A), 2 cycles (B), 4 cycles (C) and 6 cycles (D) after initiation of GP regimen, demonstrating gradual shrinkage of the targeted tumor lesion.
